# Supplementary material for: Bradycardia Risk Associated with Intravenous Dexmedetomidine: A Retrospective Study of Risk Factors and Clinical Outcomes in Critically Ill Patients (BRAID)
Source: Research Square preprint supplement (doi:10.21203/rs.3.rs-7547505/v1), 2025-09-23
Supplement: Supplementary file 1 [file e33f6668cf34dde6b4320055.docx]

Supplementary Materials

# Bradycardia Risk Associated with Intravenous Dexmedetomidine: A Retrospective Study of Risk Factors and Clinical Outcomes in Critically Ill Patients (BRAID)

Table of Contents:

Page 2 Inclusion and exclusion criteria

Page 3 Supplemental Table 1: Multivariable logistic regression for bradycardia

Page 4 Supplemental Figure 1: Multivariable regression adjusting for baseline heart rate.

Page 5 Supplemental Figure S2: Risk factors for bradycardia with bradycardia defined as heart rate less than 50.

# Inclusion and Exclusion Criteria

**Inclusion Criteria:**

- Patients ≥18 years old
- Patients receiving dexmedetomidine infusion
- Documented heart rate data throughout dexmedetomidine administration
- Mechanically ventilated patients

**Exclusion Criteria:**

- Pre-existing bradycardia (heart rate <60 bpm) in the 24 hours before dexmedetomidine initiation
- Patients on heart rate lowering medications
- Patients receiving neuromuscular blocking agents (paralytics)

# Additional Analyses

# Table S1. Multivariable logistic regression analysis of factors associated with bradycardia

| **Variable** | **OR** | **OR (95% CI)** | **p-value** |
| --- | --- | --- | --- |
| Age (per year) | 1.01 | 1.01 (1.01-1.02) | <0.001 |
| Male Sex | 0.89 | 0.89 (0.77-1.03) | 0.109 |
| BMI (per unit) | 1.01 | 1.01 (1.00-1.02) | 0.009 |
| SOFA Score (per point) | 1.03 | 1.03 (1.00-1.05) | 0.043 |
| Congestive Heart Failure | 0.84 | 0.84 (0.72-0.97) | 0.022 |
| Peripheral Vascular Disease | 0.71 | 0.71 (0.60-0.84) | <0.001 |
| Cerebrovascular Disease | 1.21 | 1.21 (1.02-1.43) | 0.031 |
| Dementia | 1.68 | 1.68 (1.21-2.32) | 0.002 |
| Chronic Pulmonary Disease | 1.21 | 1.21 (1.04-1.41) | 0.016 |
| Diabetes | 0.72 | 0.72 (0.59-0.87) | <0.001 |
| Hypertension | 0.99 | 0.99 (0.74-1.33) | 0.966 |
| Renal Disease | 0.93 | 0.93 (0.79-1.11) | 0.430 |
| Moderate/Severe Liver Disease | 1.64 | 1.64 (1.25-2.14) | <0.001 |

OR = Odds Ratio; CI = Confidence Interval

#
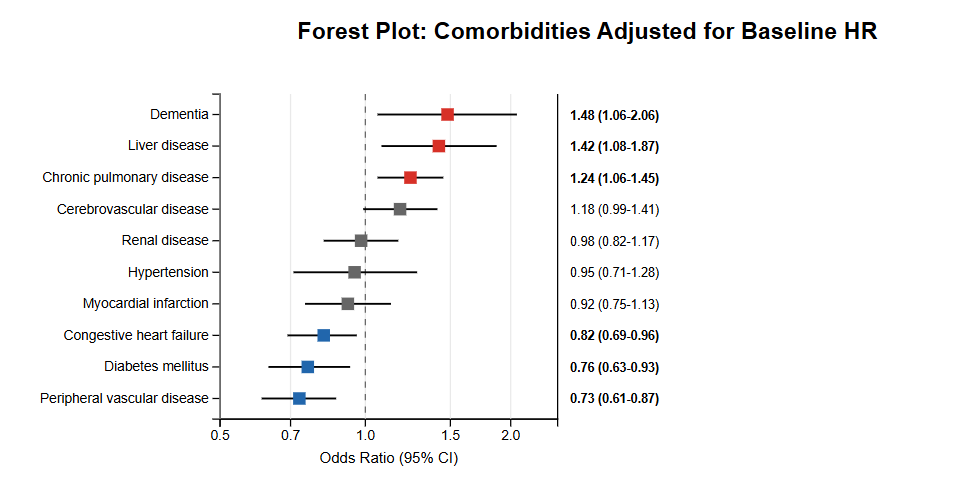


## Figure S1. Multivariable regression adjusting for baseline heart rate.

## Severe Bradycardia (HR < 50 bpm)

#
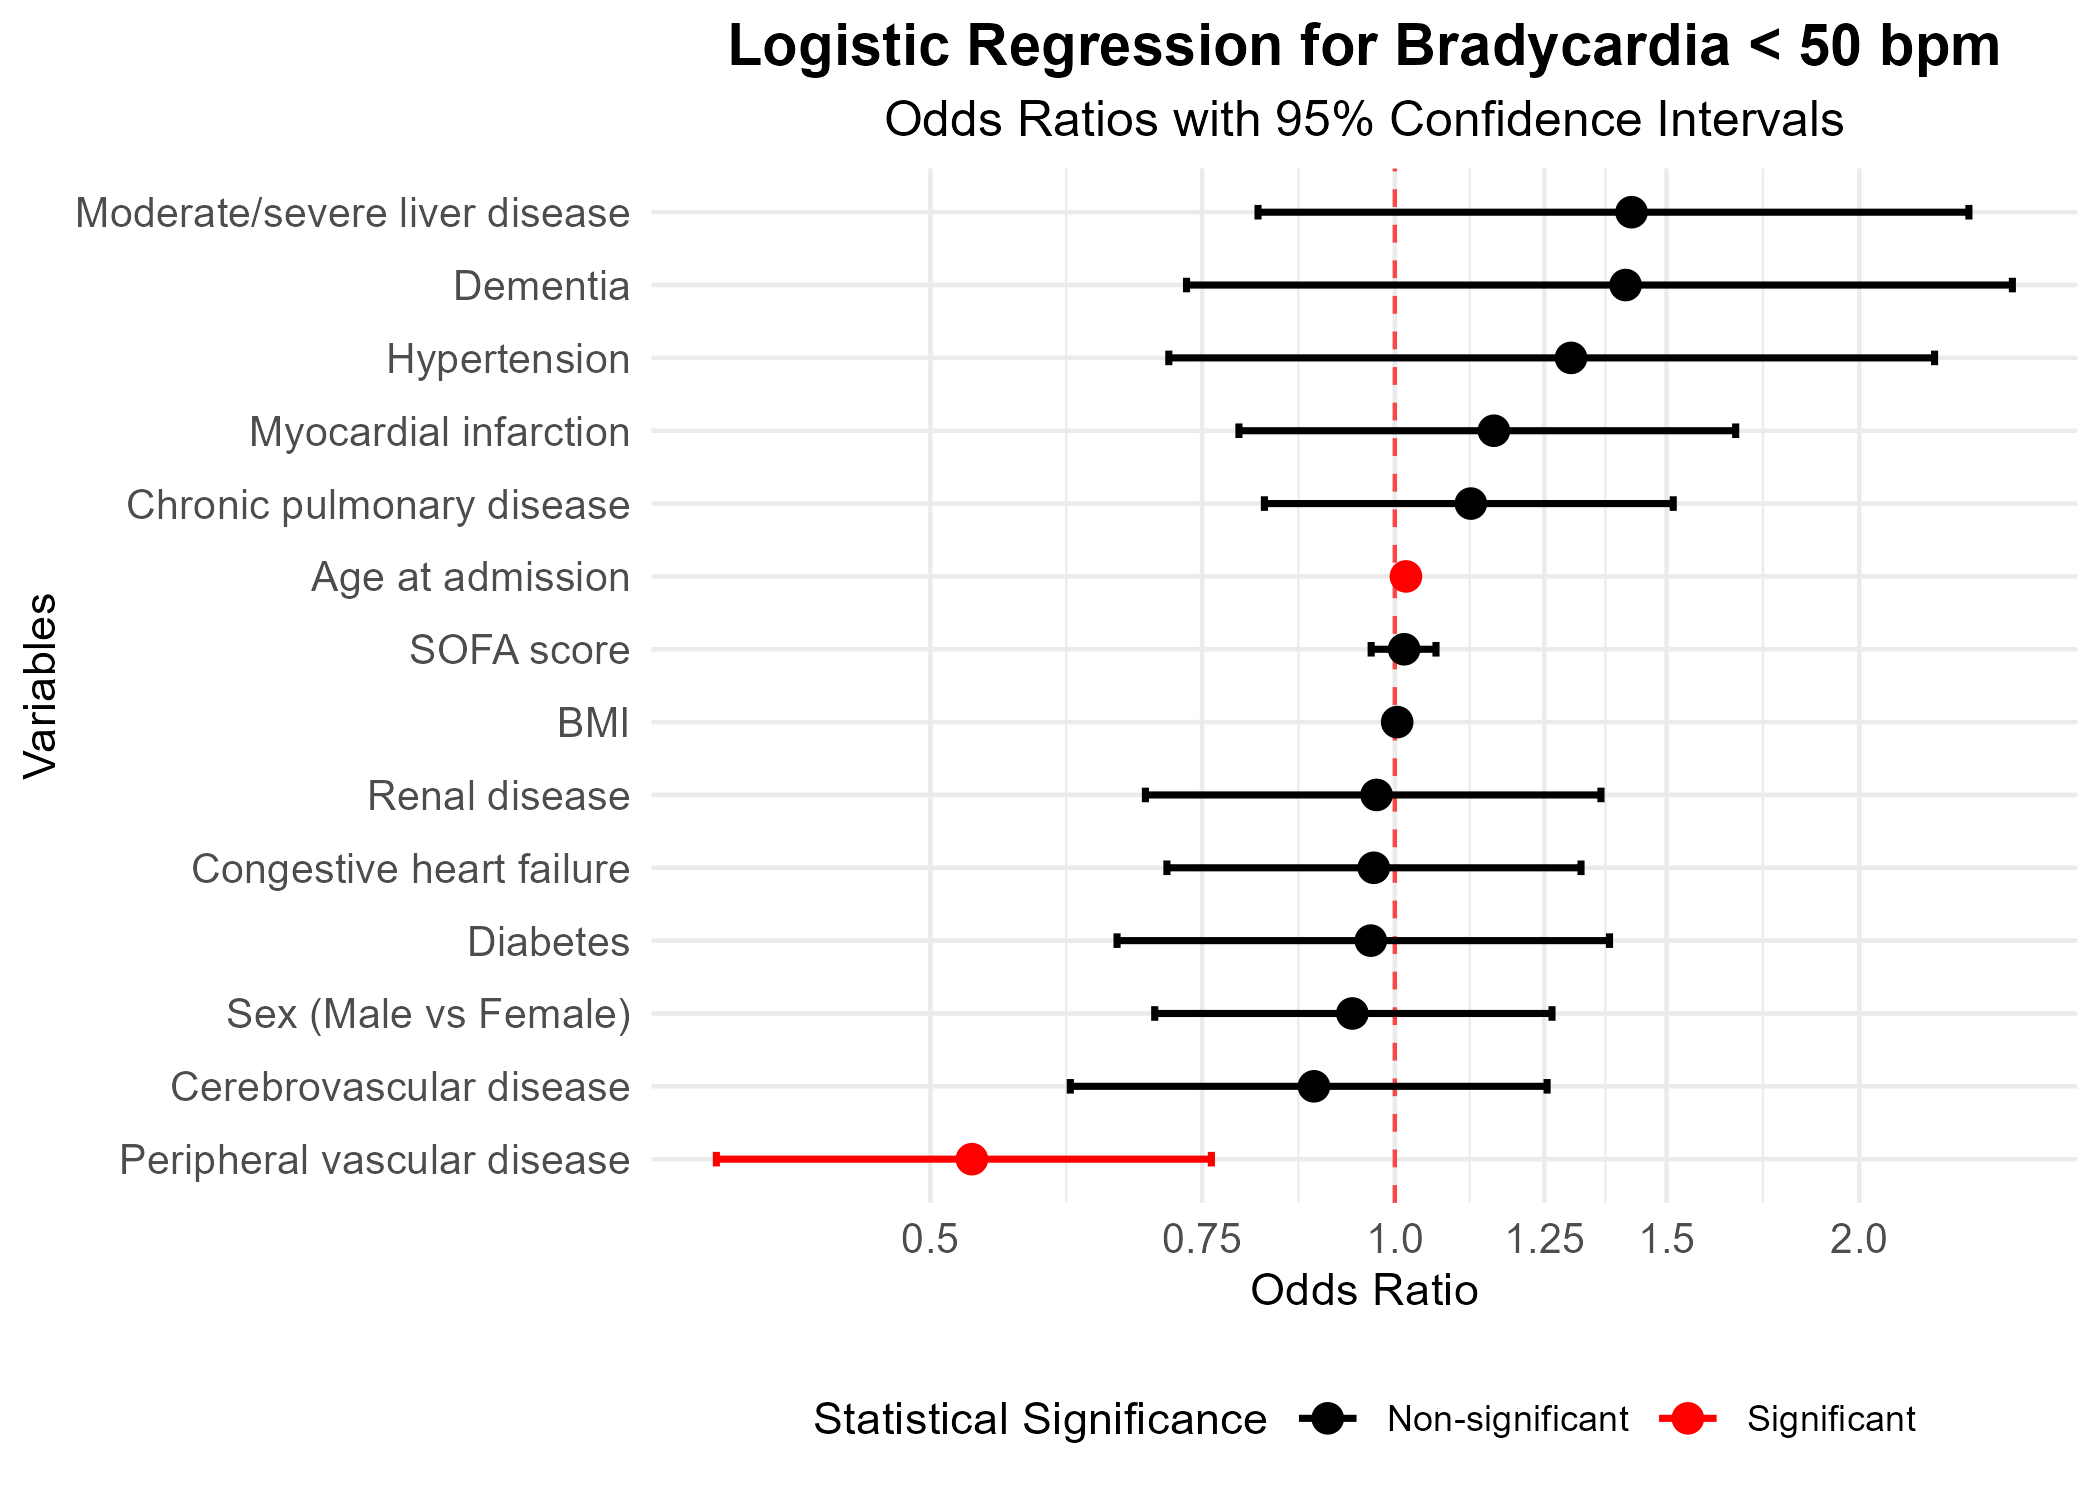


# Figure S2. Risk factors for bradycardia with bradycardia defined as heart rate less than 50.

# Table S2. Multivariable Logistic Regression Results for Bradycardia <50 bpm

| Variable | Odds Ratio | 95% CI | P-value |
| --- | --- | --- | --- |
| Age at admission | 1.017 | (1.006 - 1.028) | 0.0021 |
| Sex (Male vs Female) | 0.939 | (0.699 - 1.264) | 0.6745 |
| BMI | 1.004 | (0.987 - 1.016) | 0.6353 |
| SOFA score | 1.014 | (0.965 - 1.063) | 0.5733 |
| Myocardial infarction | 1.159 | (0.792 - 1.663) | 0.4334 |
| Congestive heart failure | 0.969 | (0.712 - 1.32) | 0.8417 |
| Peripheral vascular disease | 0.532 | (0.363 - 0.761) | 0.0008 |
| Cerebrovascular disease | 0.886 | (0.616 - 1.255) | 0.5054 |
| Dementia | 1.411 | (0.733 - 2.513) | 0.2698 |
| Chronic pulmonary disease | 1.120 | (0.823 - 1.515) | 0.4655 |
| Hypertention | 1.301 | (0.714 - 2.238) | 0.3642 |
| Diabetes | 0.965 | (0.661 - 1.378) | 0.8478 |
| Moderate/severe liver disease | 1.424 | (0.815 - 2.355) | 0.1894 |
| Renal disease | 0.973 | (0.689 - 1.36) | 0.8749 |
